# Supplementary material for: Microfluidic channel-integrated hanging drop array chip operated by pushbuttons for spheroid culture and analysis
Source: Royal Society of Chemistry journal article supplement (doi:10.1039/d0an01091j), 2020-01-01
Supplement: d0an01091j1.pdf [file d0an01091j1.pdf]

Electronic Supplementary Information (ESI)

## **Microfluidic channel-integrated hanging drop array chip for spheroid culture and analysis operated by pushbuttons**

Juhwan Park<sup>a</sup>, Hwisoo Kim<sup>a</sup>, and Je-Kyun Park<sup>\*,a,b</sup>

<sup>a</sup> Department of Bio and Brain Engineering, Korea Advanced Institute of Science and Technology (KAIST), 291 Daehak-ro, Yuseong-gu, Daejeon 34141, Republic of Korea.

<sup>b</sup> KAIST Institute for Health Science and Technology, 291 Daehak-ro, Yuseong-gu, Daejeon 34141, Republic of Korea.

**Table S1.** Operation procedures to load cell suspensions in HDA chip.

| <b>Step</b> | <b>Operation</b>                                                              |
|-------------|-------------------------------------------------------------------------------|
| 1           | Removal of a pre-loaded medium at inlets, outlets, and HDA using an aspirator |
| 2           | Loading the desired concentration of cell suspension into inlets              |
| 3           | One time push of Button 1                                                     |
| 4           | One time push of Button 2                                                     |
| 5           | Two times push of Button 1                                                    |
| 6           | Removal of remaining cell suspension in inlets                                |
| 7           | Loading the fresh medium into inlets                                          |
| 8           | Three times push of Button 1                                                  |
| 9           | Two times push of Button 2                                                    |
| 10          | Two times push of Button 1                                                    |
| 11          | Two times push of Button 2                                                    |
| 12          | Filling of inlets and outlets with a fresh medium                             |

**Table S2.** Operation procedures for medium exchange.

| <b>Step</b> | <b>Operation</b>                                  |
|-------------|---------------------------------------------------|
| 1           | Removal of an old medium at inlets and outlets    |
| 2           | Loading the fresh medium at inlets                |
| 3           | One time push of Button 1                         |
| 4           | Three times push of Button 2                      |
| 5           | Three times push of Button 1                      |
| 6           | One time push of Button 2                         |
| 7           | Filling of inlets and outlets with a fresh medium |

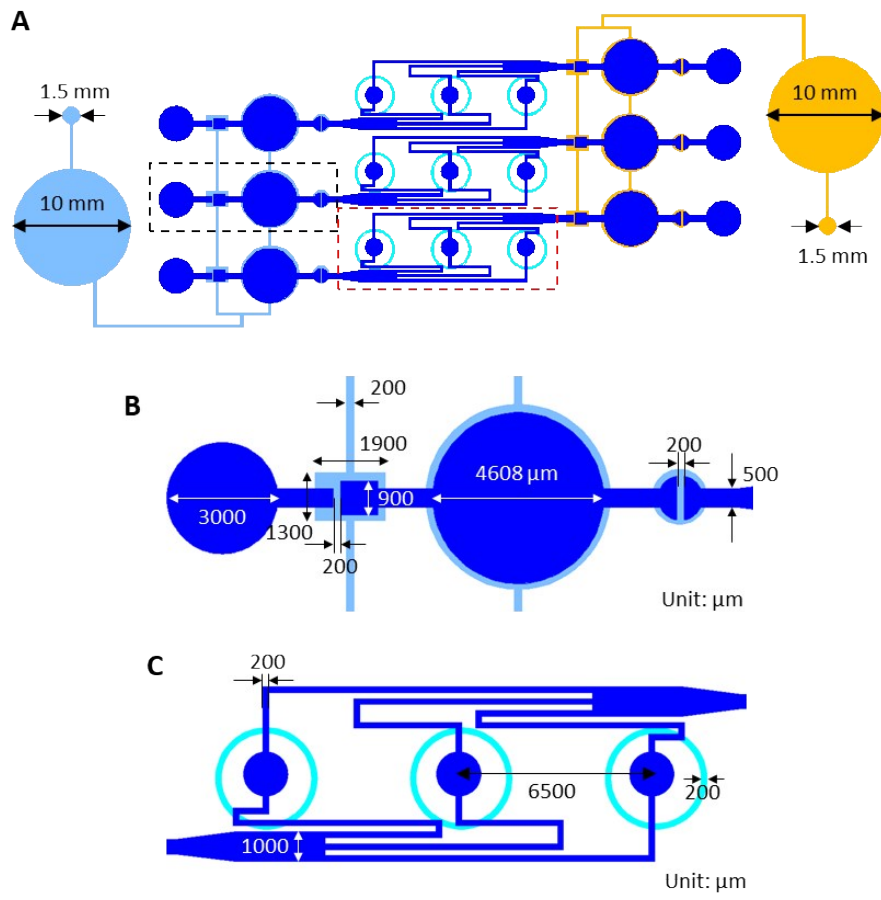

**Fig. S1** Design parameters of the device. (A) Schematic of the device. (B) Enlarged schematic view of (B) the black dotted box and (C) the red dotted box in panel A.

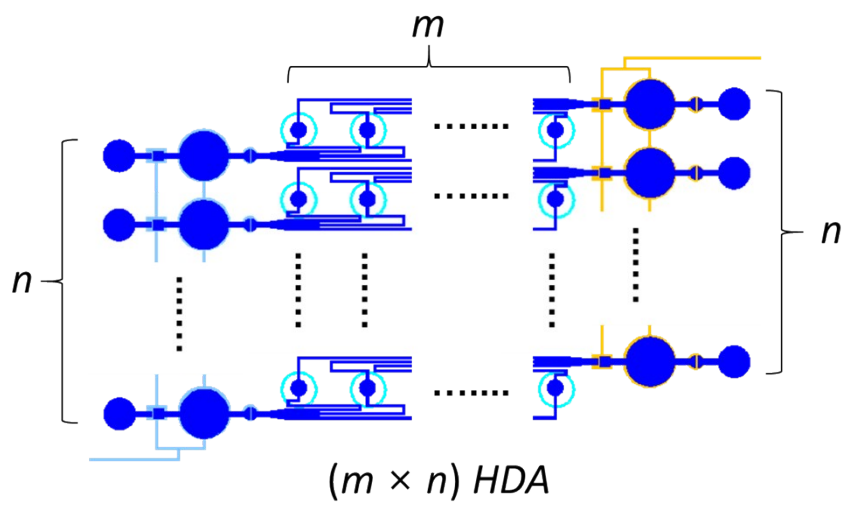

**Fig. S2** Schematic showing the scalability of the proposed device into  $(m \times n)$  HDA.
